# Supplementary material for: Fluid loading in abdominal surgery - saline versus hydroxyethyl starch (FLASH Trial): study protocol for a randomized controlled trial
Source: PubMed Central journal article supplement (PMC4687283; doi:10.1186/s13063-015-1085-3), 2015-12-21
Supplement: 13063_2015_1085_MOESM1_ESM.pdf [file 13063_2015_1085_MOESM1_ESM.pdf]

## Additional file 1: Acute Kidney Injury (AKI) risk index [37]

Individual preoperative risk factors included in the general surgery acute kidney injury risk index:

- Age  $\geq$  56 years
- Male sex
- Active Congestive Heart Failure
- Ascites
- Hypertension
- Emergency Surgery
- Intraperitoneal Surgery
- Renal insufficiency – mild or moderate  
(Serum Creatinine  $>105$   $\mu\text{mol/L}$  or  $1.2$   $\text{mg/dL}$ )
- Diabetes Mellitus – Oral or insulin therapy

Five general surgery acute kidney risk index classes are based on the number of risk factor the patient possesses:

| Risk class         |                 |                  |                 |                       |
|--------------------|-----------------|------------------|-----------------|-----------------------|
| <b>Class I</b>     | <b>Class II</b> | <b>Class III</b> | <b>Class IV</b> | <b>Class V</b>        |
| 0 – 2 risk factors | 3 risk factors  | 4 risk factors   | 5 risk factors  | + than 6 risk factors |

Only patients with a risk class of 3 or more will eligible for inclusion in the FLASH trial
