# Supplementary material for: Fluid loading in abdominal surgery - saline versus hydroxyethyl starch (FLASH Trial): study protocol for a randomized controlled trial
Source: Trials. 2015 Dec 21;16:582. doi: 10.1186/s13063-015-1085-3 (PMC4687283; doi:10.1186/s13063-015-1085-3)
Supplement: Additional file 2: — Sepsis-related Organ Failure Assessment (SOFA) score. (PDF 68 kb) [file 13063_2015_1085_MOESM2_ESM.pdf]

**Additional file 2: SOFA scoring (excluding Glasgow Coma Score) - the most deranged value recorded in the previous 24 h will used [42]**

| ORGAN SYSTEM                                                          | 0                                      | 1            | 2                                                               | 3                                                                              | 4                                                                               | Organ scores |
|-----------------------------------------------------------------------|----------------------------------------|--------------|-----------------------------------------------------------------|--------------------------------------------------------------------------------|---------------------------------------------------------------------------------|--------------|
| <b>Respiration</b><br>PaO <sub>2</sub> / FiO <sub>2</sub> (in mmHg)   | >400                                   | 301 – 400    | <301 (without respiratory support*)                             | 101 – 200 (with respiratory support*)                                          | ≤100 (with respiratory support*)                                                |              |
| <b>Coagulation</b><br>Platelets (x 10 <sup>3</sup> /mm <sup>3</sup> ) | >150                                   | 101 – 150    | 51 – 100                                                        | 21 – 50                                                                        | ≤20                                                                             |              |
| <b>Liver</b><br>Bilirubin (μmol/l)                                    | <20                                    | 20 – 32      | 33 – 101                                                        | 102 – 204                                                                      | >204                                                                            |              |
| <b>Cardiovascular</b><br>Hypotension                                  | Mean arterial pressure (MAP) > 70 mmHg | MAP <70 mmHg | dopamine ≤ 5.0 (dose in μg/kg/min)<br>or any dose<br>dobutamine | dopamine >5.0 (dose in μg/kg/min)<br>or noradrenalin ≤0.1<br>or adrenalin ≤0.1 | dopamine >15.0 (dose in μg/kg/min)<br>or adrenalin >0.1<br>or noradrenalin >0.1 |              |
| <b>Renal</b><br>Creatinine (μmol/l)                                   | <110                                   | 110 – 170    | 171 – 299                                                       | 300 – 440                                                                      | > 440                                                                           |              |
| <b>OR</b> Urine output                                                |                                        |              |                                                                 | or <500 ml / day                                                               | or <200 ml / day                                                                |              |

If a value has not been measured, the score 0 should be given. \*Respiratory support is defined as any form of invasive or non-invasive ventilation including continuous positive airway pressure delivered through mask or tracheotomy
